# Supplementary material
Source: publisher site journal article supplement (https://www.dovepress.com/article/386745)

# Supplementary Figures

## Representative traces of locomotor activity in the OFT

### Normal group

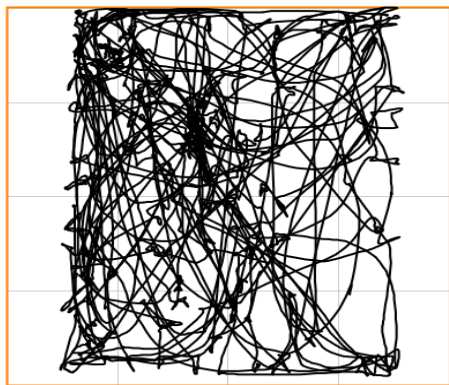

1

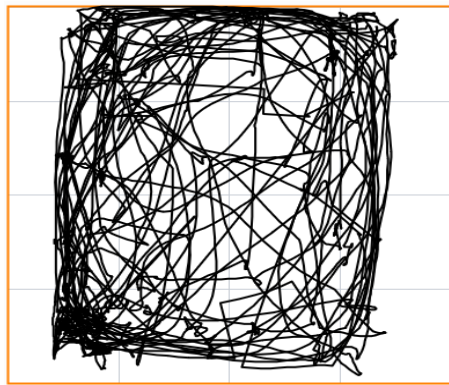

2

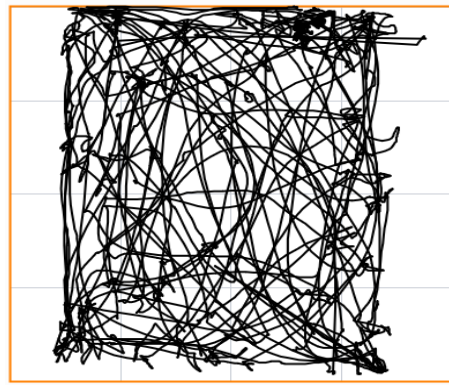

3

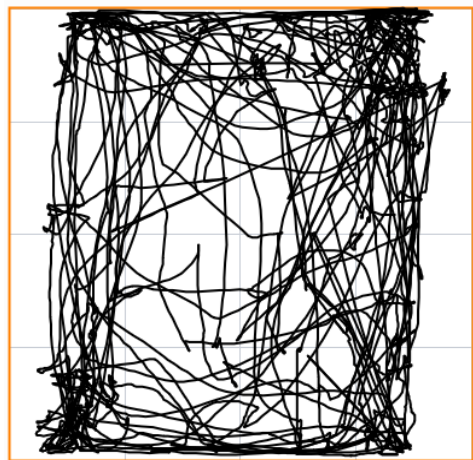

4

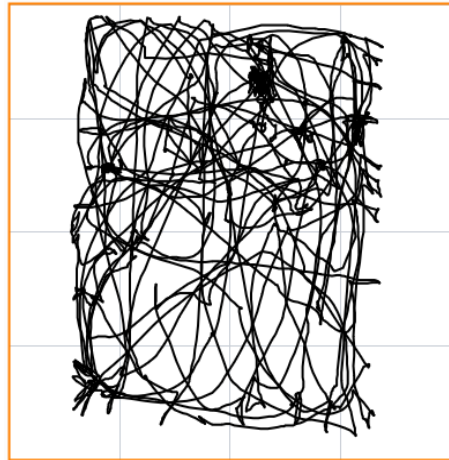

5

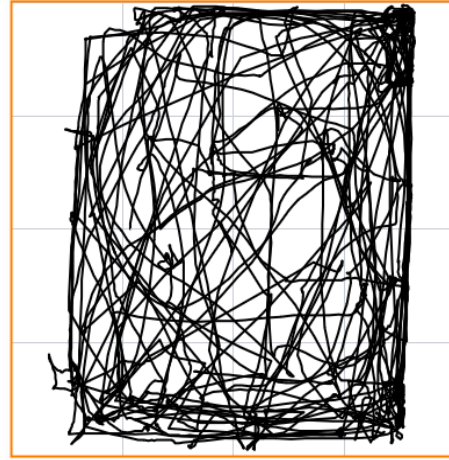

6

## Representative traces of locomotor activity in the OFT

WIRS group

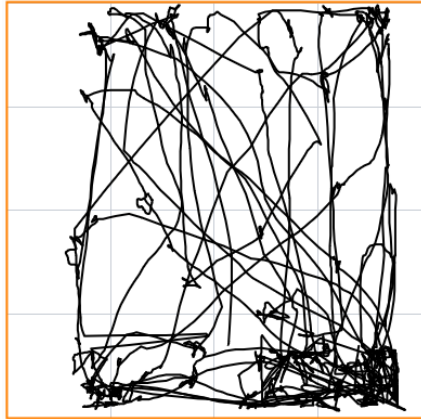

1

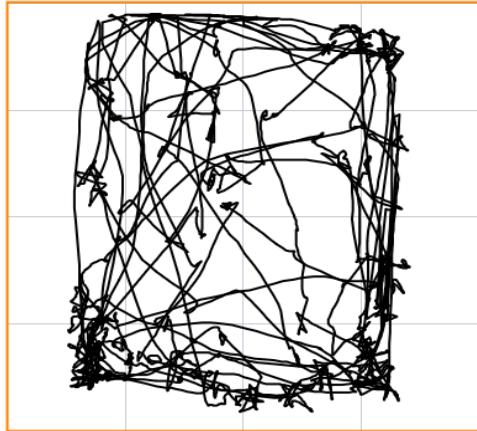

2

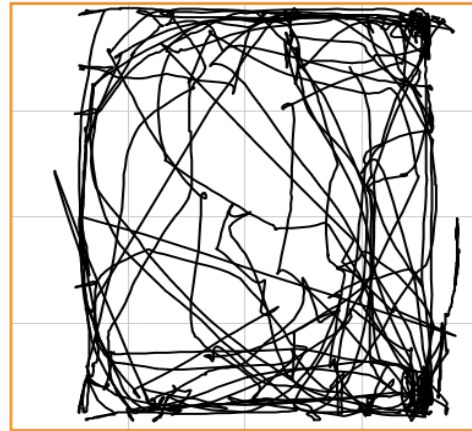

3

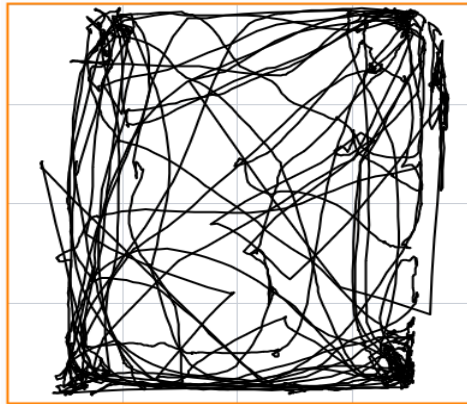

4

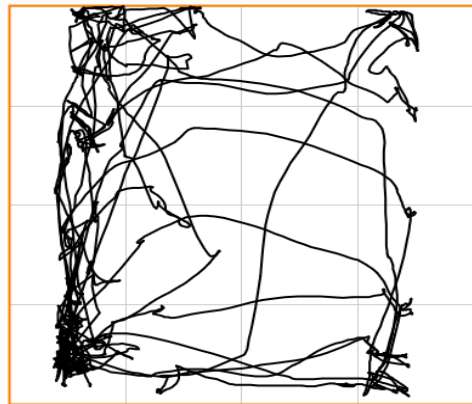

5

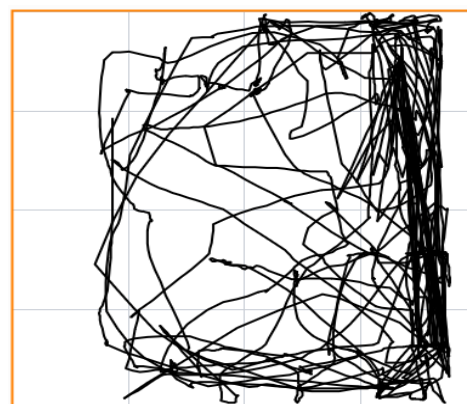

6

# Representative traces of locomotor activity in the OFT

MOO1

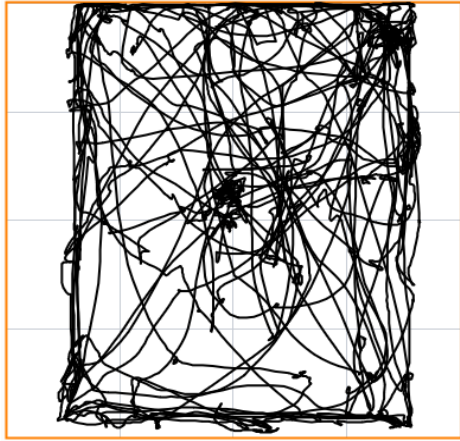

1

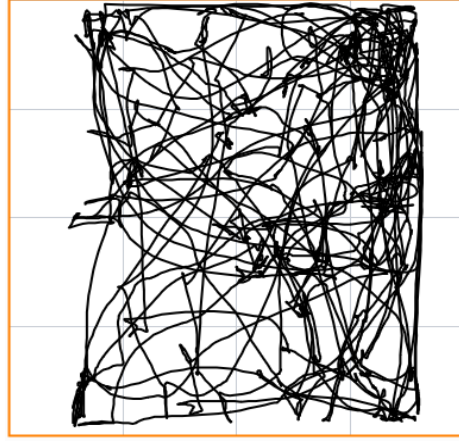

2

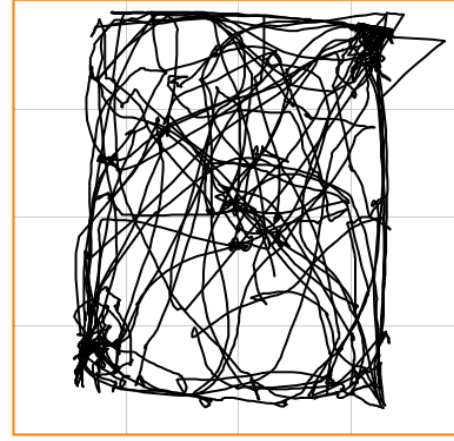

3

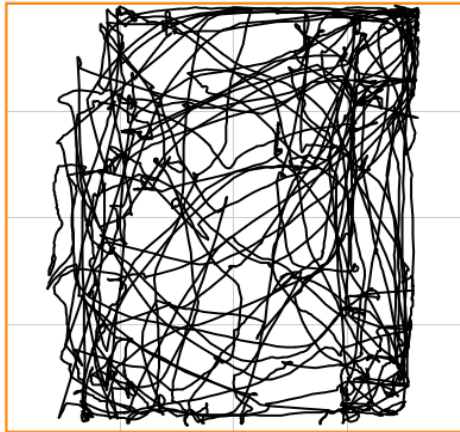

4

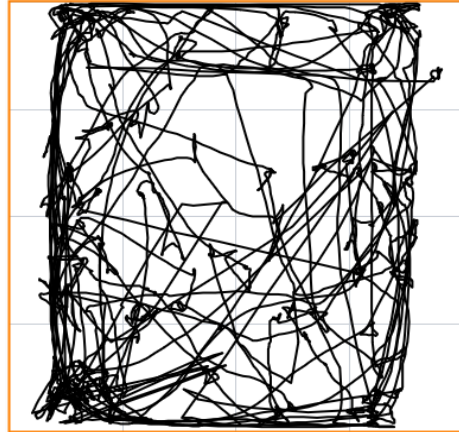

5

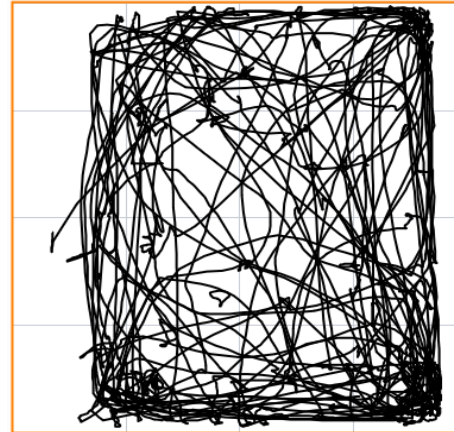

6



# Representative traces of locomotor activity in the OFT

WIRS+MOO2

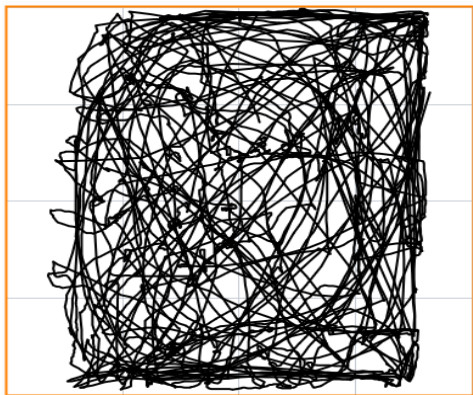

1

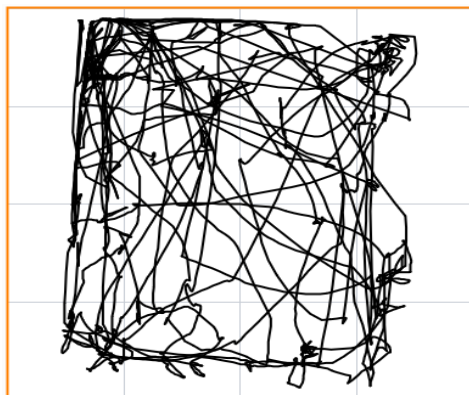

2

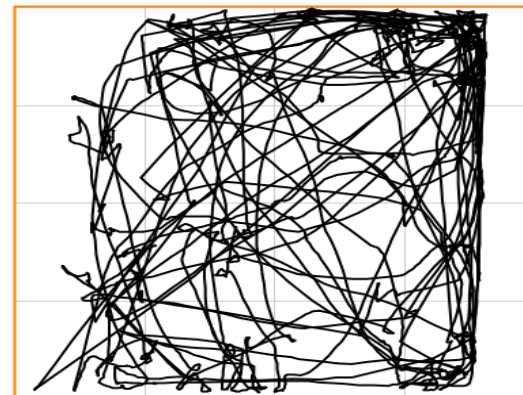

3

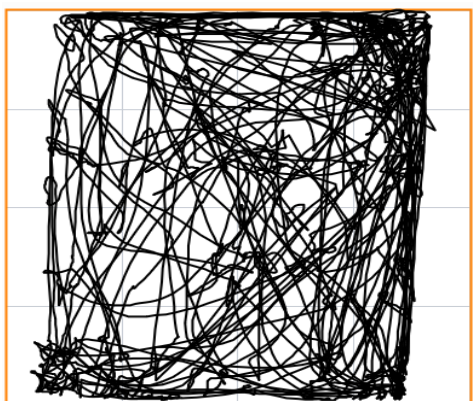

4

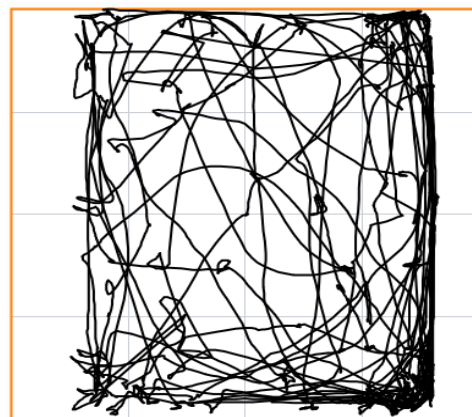

5

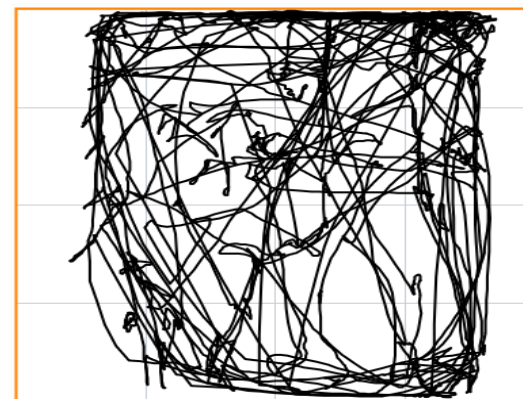

6

Normal group

1

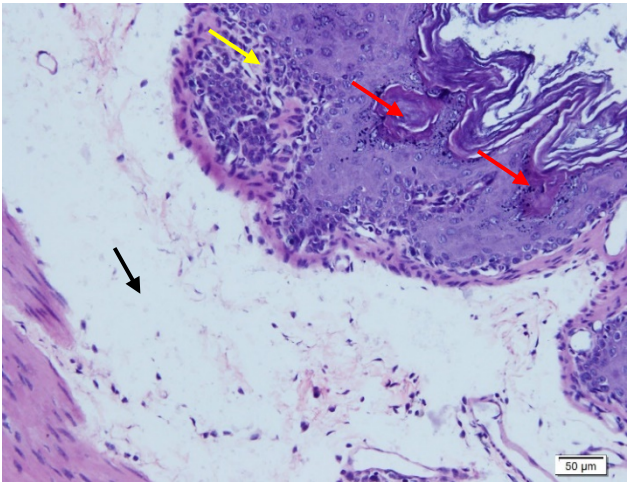

2

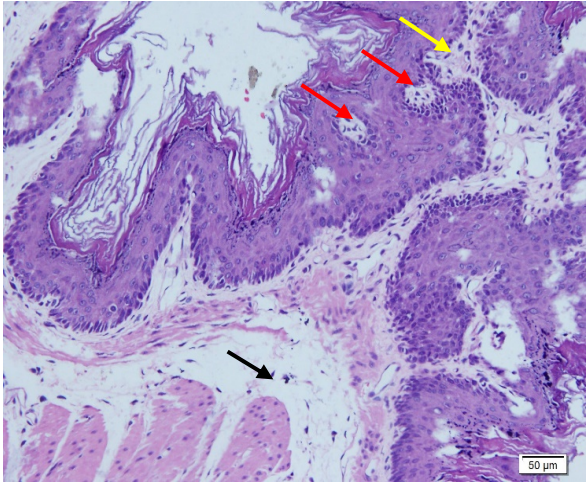

3

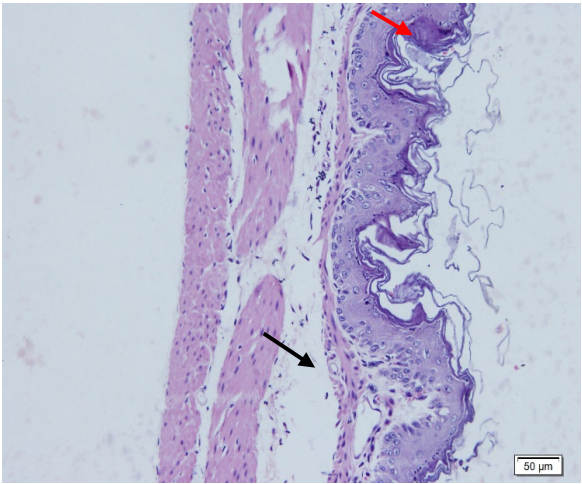



## WIRS group

1

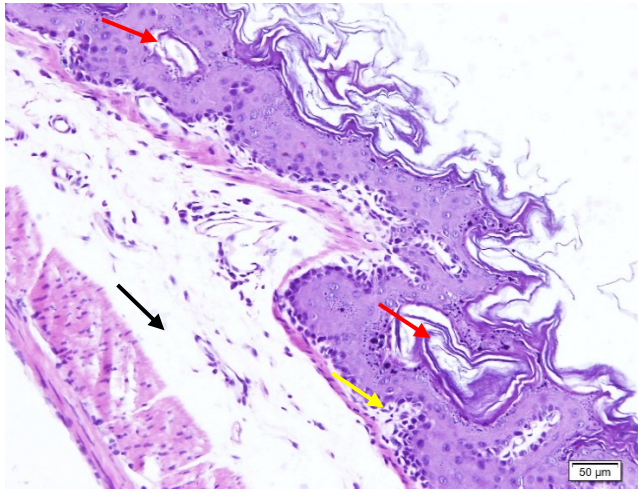

2

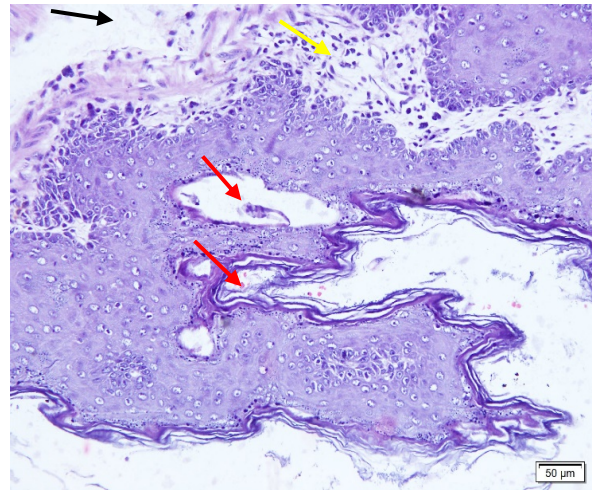

3

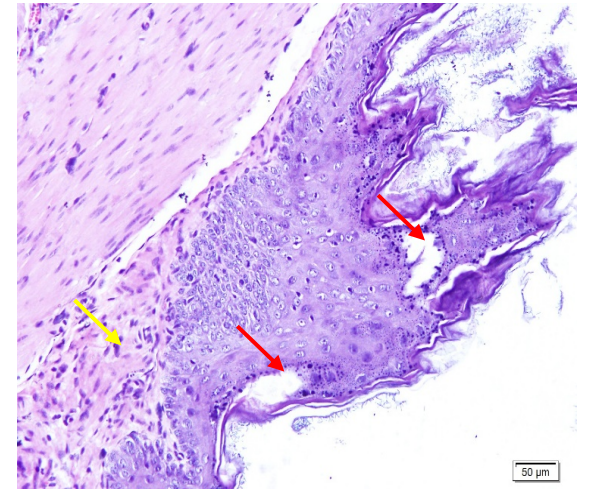

## WIRS+MOO1 group

1

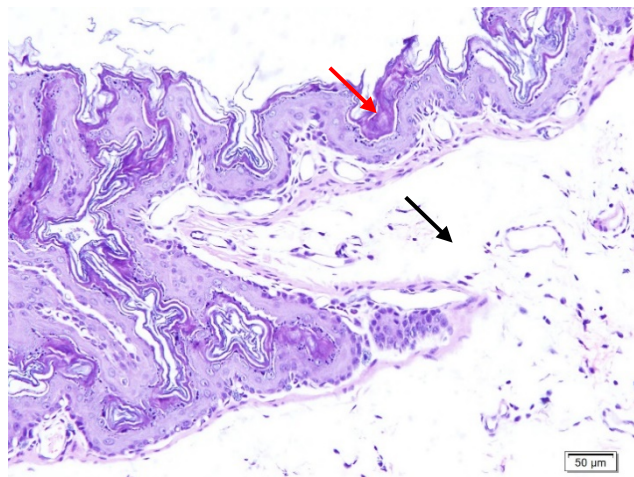

2

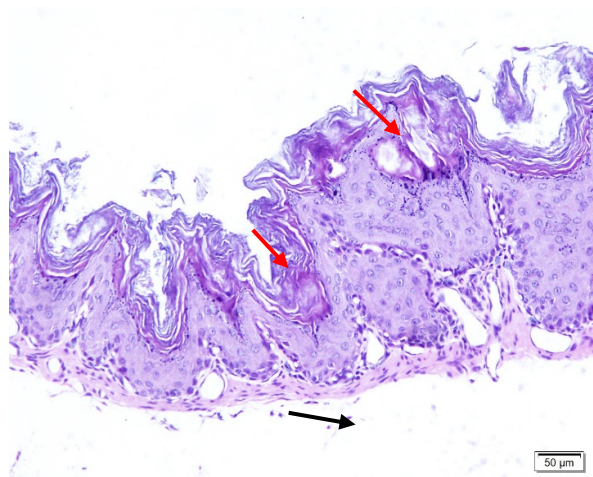

3

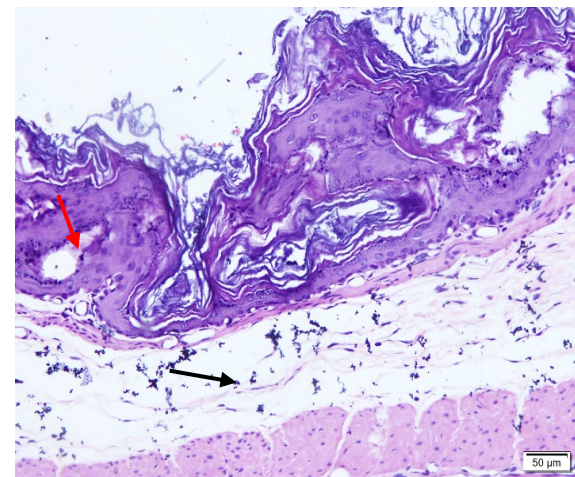



## WIRS+MOO2 group

1

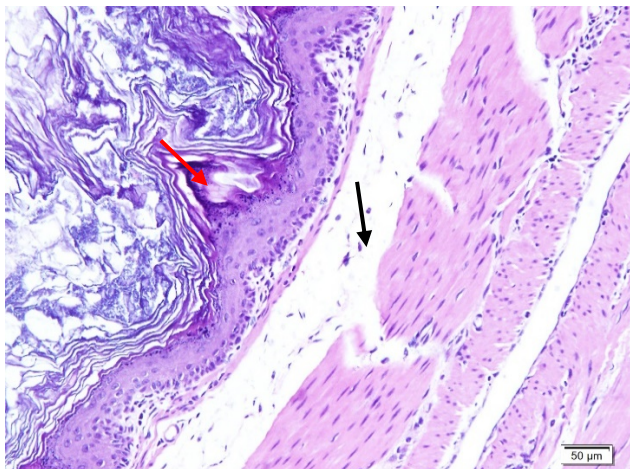

2

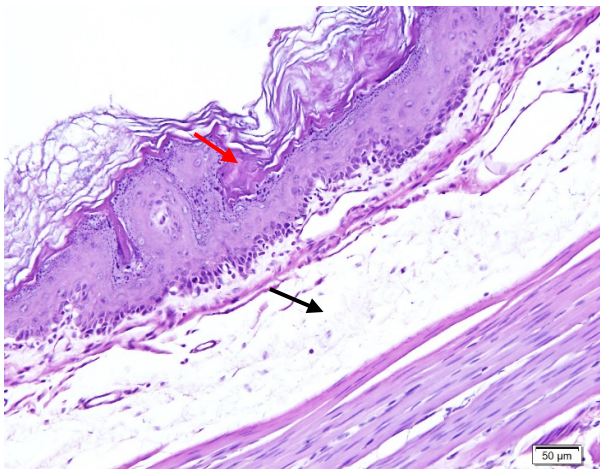

3

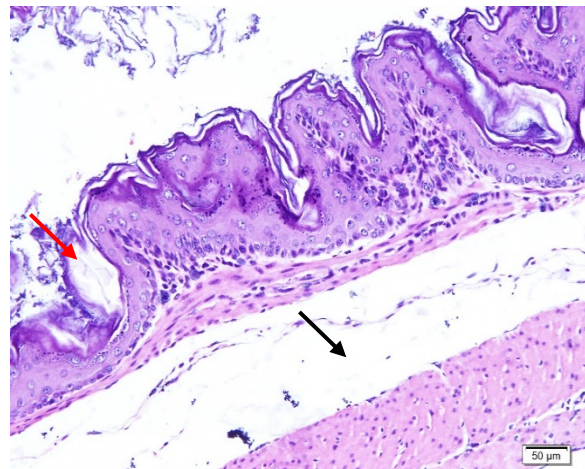

Supplement: Supplementary file 1 [file get_supplementary_file.php]
